# Supplementary material for: A Signature Inferred from Drosophila Mitotic Genes Predicts Survival of Breast Cancer Patients
Source: PLoS One. 2011 Feb 28;6(2):e14737. doi: 10.1371/journal.pone.0014737 (PMC3046113; doi:10.1371/journal.pone.0014737)
Supplement: Table S1 — Ranking of the Affymetrix probesets of the DM signature according to their z-scores. The Affymetrix probesets associated with the DM signature genes are ranked according to their Cox z-score computed on the training dataset (Pawitan). The contribution to the difference in score between poor and good prognosis patients in the other datesets is also reported. The phenoclusters associated with the Drosophila genes [20] are abbreviated as follows: CA, chromosome aberrations; CC1, loss of sister chromatid cohesion in heterochromatin; CC2 aberrant lateral chromosome condensation; CC3, aberrant longitudinal chromosome condensation; CS1, defective chromosome duplication; CS2, precocious sister chromatid separation; CS3 and CS4, lack of sister chromatid separation; CS5, defective chromosome segregation during anaphase; SA1, short spindles; SA2, spindles with a low MT density; SA3, poorly focused spindle poles; SA4 miscellaneous spindle defects; SC1, defective chromosome condensation and cytokinesis; SC2, multiple mitotic defects; SC1, defective in early cytokinesis; SC2, defective in late cytokinesis. (0.06 MB XLS) [file pone.0014737.s003.xls]

## Sheet: Supplemental table 2
							Contribution to the difference in score
Drosophila gene symbol	Phenocluster	Human gene symbol	Human Gene official full name	Entrez Gene ID	Probeset	Pawitan z-score	Miller	Sotiriou-Desmedt	Wang
scra	CY2	ANLN	Anillin, actin binding protein	54443	222608_s_at	4.38554	2.35	-	-
Su(var)2-10	CA	PIAS1	Protein inhibitor of activated STAT, 1	8554	217863_at	-4.30366	0.2	0	-0.15
dup	CS1	CDT1	Chromatin licensing and DNA replication factor 1	81620	228868_x_at	4.17307	2.54	-	-
RnrS	CA	RRM2	Ribonucleotide reductase M2 polypeptide	6241	209773_s_at	4.11676	2.26	2.35	1.8
betaTub56D	SA1	TUBB2C	Tubulin, beta 2C	10383	213726_x_at	4.06429	0.69	0.54	0.34
betaTub56D	SA1	TUBB2C	Tubulin, beta 2C	10383	208977_x_at	4.06362	0.47	0.49	0.27
asp	SA3	ASPM	Asp (abnormal spindle) homolog, microcephaly associated (Drosophila)	259266	219918_s_at	3.99492	2.56	1.66	1.93
CycB	CS4	CCNB1	Cyclin B1	891	214710_s_at	3.94518	2.43	2.32	1.18
pav	CY1	KIF23	Kinesin family member 23	9493	204709_s_at	3.90986	2.51	1.23	0.98
RnrS	CA	RRM2	Ribonucleotide reductase M2 polypeptide	6241	201890_at	3.90689	2.7	2.64	1.95
CG13298	CS3	SF3B14	Splicing factor 3B, 14 kDa subunit	51639	223416_at	3.84748	0.38	-	-
Su(var)2-10	CA	PIAS1	Protein inhibitor of activated STAT, 1	8554	217862_at	-3.83895	0.45	0.09	0.35
gwl	CC3	MASTL	Microtubule associated serine/threonine kinase-like	84930	228468_at	3.72866	0.69	-	-
tum	CY1	RACGAP1	Rac GTPase activating protein 1	29127	222077_s_at	3.69482	1.88	1.6	1.7
feo	CY1	PRC1	Protein regulator of cytokinesis 1	9055	218009_s_at	3.67744	1.65	2.11	1.45
CycB	CS4	CCNB1	Cyclin B1	891	228729_at	3.63989	2.7	-	-
cdc2	SA4	CDC2	Cell division cycle 2, G1 to S and G2 to M	983	210559_s_at	3.57392	1.76	2.08	0.77
Grip75	SA2	TUBGCP4	Tubulin, gamma complex associated protein 4	27229	213266_at	-3.56169	0.68	0.52	-0.01
cdc2	SA4	CDC2	Cell division cycle 2, G1 to S and G2 to M	983	203213_at	3.55006	2.79	1.9	1.36
fzy	CS5	CDC20	Cell division cycle 20 homolog (S. cerevisiae)	991	202870_s_at	3.52005	2.14	2.04	1.38
Klp67A	SA4	KIF18A	Kinesin family member 18A	81930	221258_s_at	3.48989	2.6	0.51	0.56
CG2807	CS4	SF3B1	Splicing factor 3b, subunit 1, 155kDa	23451	201070_x_at	-3.46374	0.27	0.04	0.22
ncd	SA4	KIFC1	Kinesin family member C1	3833	209680_s_at	3.43102	2.36	0.54	1.08
Top2	CC3	TOP2A	Topoisomerase (DNA) II alpha 170kDa	7153	201292_at	3.42701	1.54	1.99	1.4
msps	SA1	CKAP5	Cytoskeleton associated protein 5	9793	212832_s_at	3.37686	0.11	0.26	0.31
CG34438	CC2	NCAPG	Non-SMC condensin I complex, subunit G	64151	218662_s_at	3.37326	1.54	1.79	0.72
U2A	CS4	SNRPA1	Small nuclear ribonucleoprotein polypeptide A'	6627	216977_x_at	3.36197	-0.09	0.82	0.43
CG34438	CC2	NCAPG	Non-SMC condensin I complex, subunit G	64151	218663_at	3.36027	2.03	1.57	1.06
Pros26.4	CS5	PSMC1	Proteasome (prosome, macropain) 26S subunit, ATPase, 1	5700	204219_s_at	3.35223	0.36	0.37	0.18
CG3058	CS3	TXNL4A	Thioredoxin-like 4A	10907	202836_s_at	3.27087	0.91	0.52	0.12
polo	SC2	PLK1	Polo-like kinase 1 (Drosophila)	5347	202240_at	3.13865	1.18	0.94	0.4
Mcm7	CC1	MCM7	Minichromosome maintenance complex component 7	4176	208795_s_at	3.13206	0.51	0.6	0.38
Klp61F	SA4	KIF11	Kinesin family member 11	3832	204444_at	3.1247	1.46	1.25	0.91
woc	CA	ZMYM4	Zinc finger, MYM-type 4	9202	202051_s_at	-3.09816	-0.04	0.22	-0.09
U2af38	CS4	U2AF1	U2 small nuclear RNA auxiliary factor 1	7307	202858_at	3.07902	0.94	0.33	0.23
cdc2	SA4	CDC2	Cell division cycle 2, G1 to S and G2 to M	983	203214_x_at	3.04233	1.29	1.6	0.61
Ts	CA	TYMS	Thymidylate synthetase	7298	202589_at	3.0375	1.07	1.24	0.56
glu	CC2	SMC4	Structural maintenance of chromosomes 4	10051	201663_s_at	2.97904	0.08	1.06	0.69
cul-4	CA	CUL4B	Cullin 4B	8450	202214_s_at	-2.95908	0.29	-0.17	0.27
Mcm3	CC1	MCM3	Minichromosome maintenance complex component 3	4172	201555_at	2.90095	0.45	0.33	-0.12
rod	CS2	KNTC1	Kinetochore associated 1	9735	206316_s_at	2.89479	-0.29	0.49	0.7
dup	CS1	CDT1	Chromatin licensing and DNA replication factor 1	81620	209832_s_at	2.86726	0.64	0.62	0.24
dnk	CA	TK2	Thymidine kinase 2, mitochondrial	7084	204227_s_at	2.81815	-0.13	-0.13	0.04
DDB1	CA	DDB1	Damage-specific DNA binding protein 1, 127kDa	1642	208619_at	2.81405	0.29	-0.11	0.17
CG6854	CA	CTPS	CTP synthase	1503	202613_at	2.8043	0.34	0.79	0.46
pbl	CY1	ECT2	Epithelial cell transforming sequence 2 oncogene	1894	234992_x_at	2.78732	1.42	-	-
CG6937	SA3	MKI67IP	MKI67 (FHA domain) interacting nucleolar phosphoprotein	84365	224714_at	2.72902	0.41	-	-
Su(var)2-10	CA	PIAS1	Protein inhibitor of activated STAT, 1	8554	217864_s_at	-2.70592	0.13	0.05	0.36
RfC40	CA	RFC2	Replication factor C (activator 1) 2, 40kDa	5982	203696_s_at	2.7009	0.24	0.19	0.01
DNAprim	CA	PRIM2	Primase, DNA, polypeptide 2 (58kDa)	5558	205628_at	2.68424	1	0.02	0.14
Dp	CA	TFDP2	Transcription factor Dp-2 (E2F dimerization partner 2)	7029	226157_at	-2.66948	0.5	-	-
Cap	CC1	SMC3	Structural maintenance of chromosomes 3	9126	209258_s_at	-2.62149	-0.09	-0.2	0.26
CG2807	CS4	SF3B1	Splicing factor 3b, subunit 1, 155kDa	23451	211185_s_at	-2.56662	0.08	0.06	-0.03
pav	CY1	KIF23	Kinesin family member 23	9493	244427_at	2.4928	0.31	-	-
SMC2	CC2	SMC2	Structural maintenance of chromosomes 2	10592	204240_s_at	2.46325	0.22	0.92	0.28
CG7003	CA	MSH6	MutS homolog 6 (E. coli)	2956	202911_at	2.37739	0.24	0.64	0.29
asp	SA3	ASPM	Asp (abnormal spindle) homolog, microcephaly associated (Drosophila)	259266	239002_at	2.37243	1.35	-	-
RfC40	CA	RFC2	Replication factor C (activator 1) 2, 40kDa	5982	1053_at	2.33158	0.11	0.22	-0.28
U2A	CS4	SNRPA1	Small nuclear ribonucleoprotein polypeptide A'	6627	215722_s_at	2.33078	0.13	0.57	0.12
SMC1	CA	SMC1A	Structural maintenance of chromosomes 1A	8243	217555_at	-2.31353	-0.11	-0.05	0.06
cdc2	SA4	CDC2	Cell division cycle 2, G1 to S and G2 to M	983	231534_at	-2.31107	-0.02	-	-
tho2	SA1	THOC2	THO complex 2	57187	222122_s_at	-2.29488	0.06	-0.23	-0.03
Mtor	CA	TPR	Translocated promoter region (to activated MET oncogene)	7175	201730_s_at	-2.28574	-0.01	0.13	-0.02
CG4266	CS5	SFRS15	Splicing factor, arginine/serine-rich 15	57466	226082_s_at	2.269	0.28	-	-
mus209	CA	PCNA	Proliferating cell nuclear antigen	5111	201202_at	2.26678	0.38	0.67	0.64
Mcm7	CC1	MCM7	Minichromosome maintenance complex component 7	4176	210983_s_at	2.24665	0.18	0.52	-0.07
asp	SA3	ASPM	Asp (abnormal spindle) homolog, microcephaly associated (Drosophila)	259266	232238_at	2.19278	1.03	-	-
glu	CC2	SMC4	Structural maintenance of chromosomes 4	10051	201664_at	2.18852	0.32	0.62	0.62
CG5931	CS3	ASCC3L1	Activating signal cointegrator 1 complex subunit 3-like 1	23020	200058_s_at	2.18588	0.2	0.02	-0.09
DNAprim	CA	PRIM2	Primase, DNA, polypeptide 2 (58kDa)	5558	215708_s_at	2.15656	0.06	0.11	-0.06
CG2807	CS4	SF3B1	Splicing factor 3b, subunit 1, 155kDa	23451	214305_s_at	-2.14355	0.13	0.1	0.11
Bub3	CS2	BUB3	BUB3 budding uninhibited by benzimidazoles 3 homolog (yeast)	9184	201457_x_at	2.12752	0.49	-0.02	-0.02
eIF3-S10	SA1	EIF3A	Eukaryotic translation initiation factor 3, subunit A	8661	200596_s_at	-1.94928	-0.09	0.09	0.34
CG8241	CS3	DHX8	DEAH (Asp-Glu-Ala-His) box polypeptide 8	1659	231184_at	1.94406	-0.05	-	-
pbl	CY1	ECT2	Epithelial cell transforming sequence 2 oncogene	1894	219787_s_at	1.94071	0.73	0.55	0.48
noi	CA	SF3A3	Splicing factor 3a, subunit 3, 60kDa	10946	203818_s_at	-1.91895	0.02	-0.03	0.17
CG6876	CS3	PRPF31	PRP31 pre-mRNA processing factor 31 homolog (S. cerevisiae)	26121	202407_s_at	1.89862	0.33	0.37	-0.4
CG7003	CA	MSH6	MutS homolog 6 (E. coli)	2956	211450_s_at	1.87624	0.29	0.61	-0.12
Top2	CC3	TOP2A	Topoisomerase (DNA) II alpha 170kDa	7153	201291_s_at	1.78345	1.1	1.3	0.81
CG6937	SA3	MKI67IP	MKI67 (FHA domain) interacting nucleolar phosphoprotein	84365	234167_at	-1.76477	0.44	-	-
CG4266	CS5	SFRS15	Splicing factor, arginine/serine-rich 15	57466	233753_at	1.7591	0.33	-	-
tho2	SA1	THOC2	THO complex 2	57187	212994_at	-1.75434	-0.01	-0.1	0.29
RpA-70	CA	RPA1	Replication protein A1, 70kDa	6117	201529_s_at	1.73028	-0.24	-0.06	-0.21
CG2685	CA	WBP11	WW domain binding protein 11	51729	217821_s_at	1.71957	-0.43	0.05	-0.24
ida	CS5	ANAPC5	Anaphase promoting complex subunit 5	51433	200098_s_at_b	1.71567	0.01	-	-
ik2	SA1	TBK1	TANK-binding kinase 1	29110	218520_at	-1.71051	0.15	-0.22	-0.1
CG4266	CS5	SFRS15	Splicing factor, arginine/serine-rich 15	57466	222310_at	-1.70788	-0.14	-0.09	-0.15
woc	CA	ZMYM4	Zinc finger, MYM-type 4	9202	202050_s_at	-1.69447	0.14	0.15	-0.03
CG6480	CA	FRG1	FSHD region gene 1	2483	204145_at	-1.69411	-0.19	-0.13	-0.01
l(2)NC136	CA	CNOT3	CCR4-NOT transcription complex, subunit 3	4849	211141_s_at	1.67919	0.5	-0.03	0.01
CG2685	CA	WBP11	WW domain binding protein 11	51729	217822_at	1.63799	-0.03	0.04	0.14
CG2807	CS4	SF3B1	Splicing factor 3b, subunit 1, 155kDa	23451	201071_x_at	-1.62536	0.16	0.03	-0.02
Taf6	CA	TAF6	TAF6 RNA polymerase II, TATA box binding protein (TBP)-associated factor, 80kDa	6878	203572_s_at	1.62063	-0.06	-0.05	0.06
Cap	CC1	SMC3	Structural maintenance of chromosomes 3	9126	209257_s_at	-1.61529	0.18	-0.1	0.04
Nipped-A	SA2	TRRAP	Transformation/transcription domain-associated protein	8295	202642_s_at	1.60522	0.02	0.01	0.28
woc	CA	ZMYM4	Zinc finger, MYM-type 4	9202	202049_s_at	-1.58109	0.01	0.1	0.1
Orc5	CA	ORC5L	Origin recognition complex, subunit 5-like (yeast)	5001	211212_s_at	1.58053	-0.02	0.08	0.07
U2A	CS4	SNRPA1	Small nuclear ribonucleoprotein polypeptide A'	6627	206055_s_at	1.55519	0.24	0.24	0.3
CG17293	SA1	WDR82	WD repeat domain 82	80335	201934_at	-1.55211	-0.1	0.24	0.02
CG1939	CA	DCAKD	Dephospho-CoA kinase domain containing	79877	224522_s_at	-1.53746	0.17	-	-
CG18591	CS3	SNRPE	Small nuclear ribonucleoprotein polypeptide E	6635	203316_s_at	1.53611	0.28	0.05	0.16
Nipped-A	SA2	TRRAP	Transformation/transcription domain-associated protein	8295	214908_s_at	1.5223	-0.14	-0.05	-0.14
CG6686	CA	SART1	Squamous cell carcinoma antigen recognized by T cells	9092	200051_at_b	1.50986	0.14	-	-
CG8950	SA1	GTF3C3	General transcription factor IIIC, polypeptide 3, 102kDa	9330	218343_s_at	1.4967	0.07	0.15	0.06
okr	CA	RAD54L	RAD54-like (S. cerevisiae)	8438	204558_at	1.48716	0.05	0.26	0.64
Grip75	SA2	TUBGCP4	Tubulin, gamma complex associated protein 4	27229	211337_s_at	1.47158	-0.1	0.22	0.01
Dcp-1	CA	CASP7	Caspase 7, apoptosis-related cysteine peptidase	840	207181_s_at	-1.46948	-0.11	0.15	0.14
CG3605	CS3	SF3B2	Splicing factor 3b, subunit 2, 145kDa	10992	200619_at	1.44358	0.07	0.05	0.07
sti	CY2	CIT	Citron (rho-interacting, serine/threonine kinase 21)	11113	212801_at	1.42697	0.01	0.02	0.07
CG8233	CS3	KIAA1310	KIAA1310	55683	223756_at	-1.38678	-0.27	-	-
CG7003	CA	MSH6	MutS homolog 6 (E. coli)	2956	211449_at	-1.37867	-0.2	0.01	0.02
Orc5	CA	ORC5L	Origin recognition complex, subunit 5-like (yeast)	5001	204957_at	1.3582	0.05	0.12	0.1
CG4266	CS5	SFRS15	Splicing factor, arginine/serine-rich 15	57466	222311_s_at	1.35695	-0.1	0.12	0.02
eIF3-S10	SA1	EIF3A	Eukaryotic translation initiation factor 3, subunit A	8661	200597_at	-1.35557	0.06	0.14	-0.03
CG10354	CA	XRN2	5'-3' exoribonuclease 2	22803	233878_s_at	1.29907	-0.08	-	-
U2af38	CS4	U2AF1	U2 small nuclear RNA auxiliary factor 1	7307	242499_at	1.2672	0.11	-	-
Cap	CC1	SMC3	Structural maintenance of chromosomes 3	9126	209259_s_at	-1.26076	-0.04	-0.09	-0.09
pbl	CY1	ECT2	Epithelial cell transforming sequence 2 oncogene	1894	237241_at	1.23405	0.05	-	-
CG10354	CA	XRN2	5'-3' exoribonuclease 2	22803	223002_s_at	1.21478	-0.07	-	-
CG6876	CS3	PRPF31	PRP31 pre-mRNA processing factor 31 homolog (S. cerevisiae)	26121	214380_at	-1.18974	0.17	-0.04	0.01
CG8233	CS3	KIAA1310	KIAA1310	55683	220950_s_at	-1.18042	-0.18	0.09	0.09
Mtor	CA	TPR	Translocated promoter region (to activated MET oncogene)	7175	228709_at	-1.16427	-0.03	-	-
ida	CS5	ANAPC5	Anaphase promoting complex subunit 5	51433	208721_s_at	1.13953	0.03	0.09	-0.15
Dp	CA	TFDP2	Transcription factor Dp-2 (E2F dimerization partner 2)	7029	203588_s_at	1.13613	0.16	0.24	-0.13
Sas-4	SA3	CENPJ	Centromere protein J	55835	220885_s_at	1.11729	0.03	0.05	-0.05
U2A	CS4	SNRPA1	Small nuclear ribonucleoprotein polypeptide A'	6627	242146_at	-1.10824	0.06	-	-
DNAprim	CA	PRIM2	Primase, DNA, polypeptide 2 (58kDa)	5558	215709_at	1.10321	0.02	-0.01	0.04
CG6197	CA	XAB2	XPA binding protein 2	56949	218110_at	-1.04735	-0.1	0.12	0.11
CG6937	SA3	MKI67IP	MKI67 (FHA domain) interacting nucleolar phosphoprotein	84365	224713_at	1.03824	0.06	-	-
ial	SC1	AURKC	Aurora kinase C	6795	211107_s_at	1.01948	0.1	-0.02	-0.08
CG6876	CS3	PRPF31	PRP31 pre-mRNA processing factor 31 homolog (S. cerevisiae)	26121	202408_s_at	1.0143	0.29	0.1	0.08
SMC1	CA	SMC1A	Structural maintenance of chromosomes 1A	8243	239688_at	-1.00948	-0.21	-	-
Bub3	CS2	BUB3	BUB3 budding uninhibited by benzimidazoles 3 homolog (yeast)	9184	201456_s_at	-0.958477	-0.03	0.1	-0.08
Sas-4	SA3	CENPJ	Centromere protein J	55835	223513_at	0.941317	0.03	-	-
CG6015	CS3	CDC40	Cell division cycle 40 homolog (S. cerevisiae)	51362	203376_at	-0.928663	0	0.09	-0.09
CG2260	CA	WDR46	WD repeat domain 46	9277	209196_at	0.911428	0.21	0.01	-0.15
CG10754	CS3	SF3A2	Splicing factor 3a, subunit 2, 66kDa	8175	37462_i_at	-0.843211	-0.09	0.1	0.02
eIF3-S10	SA1	EIF3A	Eukaryotic translation initiation factor 3, subunit A	8661	200595_s_at	-0.842748	0	0.04	0
Bub3	CS2	BUB3	BUB3 budding uninhibited by benzimidazoles 3 homolog (yeast)	9184	201458_s_at	-0.827492	-0.06	0.04	-0.08
U2af50	CS3	U2AF2	U2 small nuclear RNA auxiliary factor 2	11338	218382_s_at	0.822602	0.07	0.02	-0.21
ida	CS5	ANAPC5	Anaphase promoting complex subunit 5	51433	200098_s_at	0.821258	0.01	0.02	0.09
Top2	CC3	TOP2A	Topoisomerase (DNA) II alpha 170kDa	7153	237469_at	0.787312	0.24	-	-
ida	CS5	ANAPC5	Anaphase promoting complex subunit 5	51433	208722_s_at	0.768734	-0.1	-0.01	0.06
CG16941	CS3	SF3A1	Splicing factor 3a, subunit 1, 120kDa	10291	201356_at	-0.765595	0.11	-0.01	0.04
dnk	CA	TK2	Thymidine kinase 2, mitochondrial	7084	204276_at	-0.76481	0.17	0.02	0.05
dnk	CA	TK2	Thymidine kinase 2, mitochondrial	7084	240300_at	-0.757881	-0.04	-	-
CG7757	CA	PRPF3	PRP3 pre-mRNA processing factor 3 homolog (S. cerevisiae)	9129	202251_at	-0.743345	0.13	-0.04	-0.11
CG10754	CS3	SF3A2	Splicing factor 3a, subunit 2, 66kDa	8175	209381_x_at	-0.725252	-0.14	0.06	0.07
NiPp1	SA3	PPP1R8	Protein phosphatase 1, regulatory (inhibitor) subunit 8	5511	207830_s_at	-0.713663	0.02	0	0
CG16941	CS3	SF3A1	Splicing factor 3a, subunit 1, 120kDa	10291	201357_s_at	0.713271	-0.09	-0.01	-0.11
l(2)NC136	CA	CNOT3	CCR4-NOT transcription complex, subunit 3	4849	229143_at	-0.706978	-0.07	-	-
Mtor	CA	TPR	Translocated promoter region (to activated MET oncogene)	7175	215220_s_at	0.681746	-0.16	-0.02	-0.12
CG6015	CS3	CDC40	Cell division cycle 40 homolog (S. cerevisiae)	51362	203377_s_at	0.647117	0.02	0	0.1
Caf1	SC1	RBBP7	Retinoblastoma binding protein 7	5931	201092_at	-0.637752	-0.08	-0.07	-0.06
cul-4	CA	CUL4B	Cullin 4B	8450	215997_s_at	-0.631858	0	-0.01	0
eIF-3p66	SA1	EIF3D	Eukaryotic translation initiation factor 3, subunit D	8664	200005_at	0.628972	0.05	-0.04	-0.04
U2af38	CS4	U2AF1	U2 small nuclear RNA auxiliary factor 1	7307	232141_at	0.582553	0.03	-	-
RpA-70	CA	RPA1	Replication protein A1, 70kDa	6117	201528_at	0.574909	-0.03	0.01	0.07
CG1234	SA1	NOC3L	Nucleolar complex associated 3 homolog (S. cerevisiae)	64318	218889_at	-0.574471	-0.04	-0.02	0.03
CG8950	SA1	GTF3C3	General transcription factor IIIC, polypeptide 3, 102kDa	9330	222604_at	-0.571834	0.01	-	-
CG16941	CS3	SF3A1	Splicing factor 3a, subunit 1, 120kDa	10291	216457_s_at	-0.562313	0.05	0	-0.01
U2af50	CS3	U2AF2	U2 small nuclear RNA auxiliary factor 2	11338	218381_s_at	-0.561396	-0.14	0	-0.08
Orc2	CC3	ORC2L	Origin recognition complex, subunit 2-like (yeast)	4999	204853_at	0.558753	0.05	0.01	0.03
CG8233	CS3	KIAA1310	KIAA1310	55683	224318_s_at	-0.555187	0.05	-	-
C12.1	CA	CWC15	CWC15 homolog (S. cerevisiae)	51503	223067_at	-0.549217	-0.03	-	-
CG5931	CS3	ASCC3L1	Activating signal cointegrator 1 complex subunit 3-like 1	23020	200058_s_at_b	0.547013	0.02	-	-
CG12050	CA	WDR75	WD repeat domain 75	84128	224721_at	-0.541223	-0.02	-	-
Nnp-1	SA1	RRP1B	Ribosomal RNA processing 1 homolog B (S. cerevisiae)	23076	212844_at	0.536172	0.05	0.04	0.01
gammaTub23C	SA2	TUBG2	Tubulin, gamma 2	27175	203894_at	-0.534337	0.02	0	0.01
CAP-D2	CC2	NCAPD2	Non-SMC condensin I complex, subunit D2	9918	201774_s_at	0.516402	0.03	0.12	-0.03
dnk	CA	TK2	Thymidine kinase 2, mitochondrial	7084	204277_s_at	-0.494929	0.11	0.01	0.07
U2af50	CS3	U2AF2	U2 small nuclear RNA auxiliary factor 2	11338	214171_s_at	-0.477224	0.05	-0.01	0.02
Int6	SA1	EIF3E	Eukaryotic translation initiation factor 3, subunit E	3646	208697_s_at	-0.453268	-0.03	-0.03	-0.03
CG7003	CA	MSH6	MutS homolog 6 (E. coli)	2956	240148_at	-0.450224	-0.05	-	-
Sas-4	SA3	CENPJ	Centromere protein J	55835	234023_s_at	0.443296	0.06	-	-
Mtor	CA	TPR	Translocated promoter region (to activated MET oncogene)	7175	201731_s_at	0.44085	0	-0.07	0.01
Orc5	CA	ORC5L	Origin recognition complex, subunit 5-like (yeast)	5001	211213_at	0.437419	0.09	0	-0.01
cul-4	CA	CUL4B	Cullin 4B	8450	202213_s_at	-0.425766	0.03	-0.02	0.01
CG1420	CS4	SLU7	SLU7 splicing factor homolog (S. cerevisiae)	10569	227990_at	-0.413323	0.03	-	-
tho2	SA1	THOC2	THO complex 2	57187	226628_at	0.39961	0	-	-
CG5931	CS3	ASCC3L1	Activating signal cointegrator 1 complex subunit 3-like 1	23020	214982_at	-0.383846	0.1	-0.01	-0.02
CG1420	CS4	SLU7	SLU7 splicing factor homolog (S. cerevisiae)	10569	231718_at	-0.383083	-0.02	-	-
Bub3	CS2	BUB3	BUB3 budding uninhibited by benzimidazoles 3 homolog (yeast)	9184	229827_at	-0.366266	-0.09	-	-
DNApol-alpha180	CA	POLA1	Polymerase (DNA directed), alpha 1, catalytic subunit	5422	204835_at	-0.365122	0.05	-0.03	-0.01
U2af50	CS3	U2AF2	U2 small nuclear RNA auxiliary factor 2	11338	229508_at	-0.351151	-0.08	-	-
CG4785	CA	C15orf44	Chromosome 15 open reading frame 44	81556	221265_s_at	-0.342731	-0.02	0	0
kin17	CS5	KIN	KIN, antigenic determinant of recA protein homolog (mouse)	22944	236887_at	-0.342626	0.03	-	-
kin17	CS5	KIN	KIN, antigenic determinant of recA protein homolog (mouse)	22944	205664_at	0.336911	0.03	0.04	0.01
ida	CS5	ANAPC5	Anaphase promoting complex subunit 5	51433	211036_x_at	0.330512	-0.02	0	0.06
mit(1)15	CS2	ZW10	ZW10, kinetochore associated, homolog (Drosophila)	9183	204812_at	-0.321622	0.01	0.01	0
cul-4	CA	CUL4B	Cullin 4B	8450	210257_x_at	0.290379	-0.03	0.03	0
CG4266	CS5	SFRS15	Splicing factor, arginine/serine-rich 15	57466	243759_at	-0.280873	-0.02	-	-
Trip1	SA1	EIF3I	Eukaryotic translation initiation factor 3, subunit I	8668	208756_at	0.260227	0.01	-0.01	-0.04
SMC1	CA	SMC1A	Structural maintenance of chromosomes 1A	8243	201589_at	0.256442	0.03	0.05	0.05
Eb1	SA1	MAPRE3	Microtubule-associated protein, RP/EB family, member 3	22924	203842_s_at	0.254556	-0.01	0.01	-0.02
ida	CS5	ANAPC5	Anaphase promoting complex subunit 5	51433	239651_at	0.248478	-0.01	-	-
Dp	CA	TFDP2	Transcription factor Dp-2 (E2F dimerization partner 2)	7029	203589_s_at	0.24756	-0.03	0.01	-0.01
glu	CC2	SMC4	Structural maintenance of chromosomes 4	10051	215623_x_at	-0.241865	-0.02	-0.03	-0.05
CG1939	CA	DCAKD	Dephospho-CoA kinase domain containing	79877	221224_s_at	-0.236597	0.06	-0.01	0.09
Bub3	CS2	BUB3	BUB3 budding uninhibited by benzimidazoles 3 homolog (yeast)	9184	209974_s_at	-0.209606	-0.05	0.01	-0.03
l(2)NC136	CA	CNOT3	CCR4-NOT transcription complex, subunit 3	4849	203239_s_at	-0.197501	-0.03	0.01	0.01
CG16941	CS3	SF3A1	Splicing factor 3a, subunit 1, 120kDa	10291	227516_at	0.189299	-0.06	-	-
eIF-3p66	SA1	EIF3D	Eukaryotic translation initiation factor 3, subunit D	8664	200005_at_b	-0.188804	-0.01	-	-
CG10418	CS3	LSM2	LSM2 homolog, U6 small nuclear RNA associated (S. cerevisiae)	57819	209449_at	-0.186039	-0.01	-0.01	0.01
CG18591	CS3	SNRPE	Small nuclear ribonucleoprotein polypeptide E	6635	231112_at	-0.154598	0.03	-	-
CG5931	CS3	ASCC3L1	Activating signal cointegrator 1 complex subunit 3-like 1	23020	232931_at	-0.152513	-0.02	-	-
CG8241	CS3	DHX8	DEAH (Asp-Glu-Ala-His) box polypeptide 8	1659	227079_at	0.15001	0	-	-
CG3058	CS3	TXNL4A	Thioredoxin-like 4A	10907	202835_at	-0.133312	-0.02	-0.01	-0.01
Eb1	SA1	MAPRE3	Microtubule-associated protein, RP/EB family, member 3	22924	229682_at	-0.131713	-0.03	-	-
tho2	SA1	THOC2	THO complex 2	57187	226626_at	-0.11284	0	-	-
U2af38	CS4	U2AF1	U2 small nuclear RNA auxiliary factor 1	7307	231904_at	-0.099867	-0.01	-	-
Eb1	SA1	MAPRE3	Microtubule-associated protein, RP/EB family, member 3	22924	203841_x_at	-0.0844472	0.01	0	0
CG8241	CS3	DHX8	DEAH (Asp-Glu-Ala-His) box polypeptide 8	1659	203334_at	0.082907	-0.03	0	0
sti	CY2	CIT	Citron (rho-interacting, serine/threonine kinase 21)	11113	242872_at	0.0698682	0.02	-	-
CG11419	CS5	ANAPC10	Anaphase promoting complex subunit 10	10393	207845_s_at	-0.0682976	0	-0.01	-0.01
Nnp-1	SA1	RRP1B	Ribosomal RNA processing 1 homolog B (S. cerevisiae)	23076	212846_at	0.0643489	0.02	0.01	0.01
Eb1	SA1	MAPRE3	Microtubule-associated protein, RP/EB family, member 3	22924	214270_s_at	-0.0516015	0.01	0	0
SMC2	CC2	SMC2	Structural maintenance of chromosomes 2	10592	213253_at	-0.0348718	-0.01	-0.01	0
CG6686	CA	SART1	Squamous cell carcinoma antigen recognized by T cells	9092	200051_at	0.0181689	0	0	0
Ts	CA	TYMS	Thymidylate synthetase	7298	217684_at	0.0101444	0	0	0
CG1939	CA	DCAKD	Dephospho-CoA kinase domain containing	79877	221225_at	0.00807154	0	2.29e-05	0
