# Supplementary material for: A Signature Inferred from Drosophila Mitotic Genes Predicts Survival of Breast Cancer Patients
Source: PLoS One. 2011 Feb 28;6(2):e14737. doi: 10.1371/journal.pone.0014737 (PMC3046113; doi:10.1371/journal.pone.0014737)
Supplement: Table S4 — Cox multivariate analysis for the NKI, Sotiriou-Desmedt and Wang datasets. The analysis shows that the DM signature is a predictor independent of several clinical parameters. (0.01 MB XLS) [file pone.0014737.s006.xls]

## Sheet: Sheet1
Table S4
NKI dataset
Covariate	Odd ratio (95% C.I.)	P-value
DM score (range 0-10)	1.27 (1.13-1.43)	9.84e-05
ER (pos=1, neg=0)	0.56 (0.33-0.96)	0.036
St Gallen (1=low risk, 0-high risk)	0.33 (0.04-2.51)	0.28
LN (positive =1, negative = 0)	0.84 (0.53-1.32)	0.45
NIH (1=low risk, 0-high risk)	0.60 (0.08-4.52)	0.62
Sotiriou-Desmedt dataset
Covariate	Odd ratio (95% C.I.)	P-value
DM score (range 0-10)	1.25 (1.08-1.46)	0.003
Size (cm)	1.23 (0.97-1.57)	0.093
Grade (1-3)	0.79 (0.56-1.09)	0.15
ER (pos=1, neg=0)	1.16 (0.67-2.00)	0.58
Age (years)	1.00 (0.97-1.02)	0.72
LN (positive =1, negative = 0)	1.13 (0.34-3.74)	0.84
Wang dataset
Covariate	Odd ratio (95% C.I.)	P-value
DM score (range 0-10)	1.23 (1.09-1.38)	0.00098
ER (pos=1, neg=0)	1.31 (0.81-2.11)	0.27
ER = estrogen receptor status
LN =lymph node status
St. Gallen criteria = Goldhirsch A, Glick JH, Gelber RD, Coates AS, Senn HJ (2001) Meeting highlights: International Consensus Panel on the Treatment of Primary Breast Cancer. Seventh International Conference on Adjuvant Therapy of Primary Breast Cancer. J Clin Oncol 19: 3817-3827
NIH criteria = National Institutes of Health Consensus Development Conference statement: adjuvant therapy for breast cancer, November 1-3, 2000. J Natl Cancer Inst Monogr: 5-15.
